# Neurology

---

OFFICIAL JOURNAL OF THE AMERICAN ACADEMY OF NEUROLOGY

SEPTEMBER 1997

VOLUME 49

NUMBER 3

SUPPLEMENT 3  
TO NEUROLOGY  
VOLUME 49

## CONSORTIUM TO ESTABLISH A REGISTRY FOR ALZHEIMER'S DISEASE: THE CERAD EXPERIENCE

---

Albert Heyman, MD  
Gerda Fillenbaum, PhD  
Florence Nash, MA  
*Supplement Editors*

***Lippincott - Raven***  
P U B L I S H E R S

Copyright © 1997 by the *American Academy of Neurology*. The views and opinions expressed in this Supplement are those of the authors and do not necessarily reflect the views of the editors of *Neurology*.

This supplement to *Neurology* was produced by Lippincott–Raven Healthcare, Division of Lippincott–Raven Publishers, Cedar Knolls, New Jersey. Its publication was sponsored by unrestricted educational grants from Eisai Inc. and Pfizer Inc, and from Novartis. This study was supported by NIA Grant No. AG06790. The views and opinions expressed in this supplement are those of the participants and authors and do not necessarily reflect the views of the American Academy of Neurology, Lippincott–Raven Publishers, Eisai, Pfizer, or Novartis.

# Neurology

Official Journal of the American Academy of Neurology

September 1997 Volume 49 Suppl 3

## Introduction

- S1 Background and purpose of the Consortium to Establish a Registry for Alzheimer's Disease  
*N. Buckholtz*

## Articles

- S2 Overview: Clinical sites, case material, and special studies  
*A. Heyman and G.G. Fillenbaum*
- S7 Clinical assessment of Alzheimer's disease  
*J.C. Morris*
- S11 Neuropsychological assessment of Alzheimer's disease  
*K.A. Welsh-Bohmer and R.C. Mohs*

- S14 Neuropathologic assessment of Alzheimer's disease  
*S. Mirra, M. Gearing, and F. Nash*
- S17 Design and implementation of a longitudinal, multicenter database  
*S.D. Edland, D. Beekly, R.L. Barnhart and G. van Belle*
- S20 Epilogue  
*L. Berg*
- S21 CERAD publications 1988–1997
- S23 Acknowledgments

The Editor-in-Chief, with advice from members of the Editorial Board, reviews requests for publication of symposia on topics of interest to readers of *Neurology*. The decision to publish a symposium as a supplement to *Neurology* is based on the topic, the supplement editors, and the contributors. Once a decision is made to publish a symposium as a supplement, it is not peer reviewed by the Editorial Board of *Neurology*. The individual authors are responsible for their own contributions, and the supplement editors are responsible for the overall quality of the supplement.

Supplement to *Neurology*. ISSN 0028-3878. Published monthly by Lippincott-Raven Publishers, 12107 Insurance Way, Hagerstown, MD 21740. Business offices are located at 227 East Washington Square, Philadelphia, PA 19106-3780. Periodicals postage paid at Hagerstown, MD, and at additional mailing offices.

Academy members should send address changes and subsequent inquiries to the American Academy of Neurology, 2221 University Ave. S.E., Suite 335, Minneapolis, MN 55414 (or call 612-623-8115). Non-Academy members should send address changes and subscription inquiries to Lippincott-Raven Publishers, Subscription Department, 12107 Insurance Way, Hagerstown, MD 21740; Call 1-800-638-3030; Fax 301-824-7390; in Maryland, call collect, 301-714-2300.

Subscription rates for 1997: Personal subscription, U.S. and possessions, \$191.00; Canada, \$223.00; foreign, \$337.00 (includes Mexico). PLEASE ADD 7% CANADIAN GST FOR ALL CANADIAN SUBSCRIPTIONS (Registration No.: 130876246); institutional, U.S., \$254.00; Canada, \$286.00; foreign, \$404.00. Special rates for students, interns, and residents per year: U.S., \$126.00; Canada, \$147.00; foreign, \$253.00. Single copies \$20.00 prepaid. In

JAPAN: Please contact our exclusive agent: MEDSI, 1-2-13 Yushima, Bunkyo-ku, Tokyo 113, Japan.

SPECIAL PROJECTS: Contact Lippincott-Raven Healthcare, 2 Ridgedale Avenue, Suite 300, Cedar Knolls, NJ 07927. 800-796-0646; Fax (201) 285-5595.

ADVERTISING REPRESENTATIVE: Roger Soderman, Metro Publishers Service Inc., P.O. Box 223, Westwood, NJ 07675-0223. 800-555-5473; FAX: (201) 772-0134.

PROFESSIONAL NOTICES AND REPRINTS AVAILABLE: Contact Lippincott-Raven Publishers, 227 East Washington Square, Philadelphia, PA 19106.

*Neurology* is indexed in Index Medicus, Excerpta Medica, Biological Abstracts, Psychological Abstracts, and Current Contents (Life Sciences and Clinical Medicine).

POSTMASTER: Send address changes to NEUROLOGY, 12107 Insurance Way, Hagerstown, MD 21740.

All rights reserved. Copyright © 1997 by the American Academy of Neurology. Except as authorized in the accompanying statement, no part of *Neurology* may be reproduced in any form or by any electronic or mechanical means, including information storage and retrieval systems, without the publisher's written permission. Authorization to photocopy items for internal or personal use, or the internal or personal use of specific clients, is granted by the American Academy of Neurology for libraries and other users registered with the Copyright Clearance Center Transactional Reporting Service, provided that the per-copy fee of \$3.00 is paid directly to the Copyright Clearance Center, 222 Rosewood Drive, Danvers, MA 01923. Call (508) 750-8400 or fax (508) 750-4744 for copying beyond that permitted by Sections 107 or 108 of the U.S. Copyright Law. This authorization does not extend to other kinds of copying, such as copying for general distribution, for advertising or promotional purposes, for creating new collective works, or for resale.

## **Dedication**

We are grateful to Zaven S. Khachaturian, PhD, and Teresa S. Radebaugh, ScD. They were the first to recognize the need for CERAD and to imagine its full potential for clinical investigations of dementia, in both the US and abroad. From the beginning, they generated critical support, helped shape its mission, and were constantly available to lend encouragement and guidance. For their invaluable contributions, we dedicate to them this summary of the accomplishments of CERAD.
